# Supplementary material for: The Antioxidant Enzyme Methionine Sulfoxide Reductase A (MsrA) Interacts with Jab1/CSN5 and Regulates Its Function
Source: Antioxidants (Basel). 2020 May 24;9(5):452. doi: 10.3390/antiox9050452 (PMC7278660; doi:10.3390/antiox9050452)
Supplement: Supplementary file 1 [file antioxidants-09-00452-s001.xlsx]

## Sheet: Sheet0
Entry	Organism	Taxonomic lineage (ALL)	Protein names	Length	Cross-reference (INTERPRO)
Q8LAZ7	Arabidopsis thaliana (Mouse-ear cress)	cellular organisms, Eukaryota, Viridiplantae, Streptophyta, Streptophytina, Embryophyta, Tracheophyta, Euphyllophyta, Spermatophyta, Magnoliopsida, Mesangiospermae, eudicotyledons, Gunneridae, Pentapetalae, rosids, malvids, Brassicales, Brassicaceae, Camelineae, Arabidopsis, Arabidopsis thaliana (Mouse-ear cress)	COP9 signalosome complex subunit 5a (Signalosome subunit 5a) (EC 3.4.-.-) (Jun activation domain-binding homolog 1)	357	IPR037740;IPR040961;IPR000555;IPR037518;
P91001	Caenorhabditis elegans	cellular organisms, Eukaryota, Opisthokonta, Metazoa, Eumetazoa, Bilateria, Protostomia, Ecdysozoa, Nematoda (roundworms), Chromadorea, Rhabditida, Rhabditina, Rhabditomorpha, Rhabditoidea, Rhabditidae, Peloderinae, Caenorhabditis, Caenorhabditis elegans	COP9 signalosome complex subunit 5 (Signalosome subunit 5) (EC 3.4.-.-) (JAB1 homolog)	368	IPR037740;IPR040961;IPR000555;IPR037518;
Q92905	Homo sapiens (Human)	cellular organisms, Eukaryota, Opisthokonta, Metazoa, Eumetazoa, Bilateria, Deuterostomia, Chordata, Craniata, Vertebrata, Gnathostomata (jawed vertebrates), Teleostomi, Euteleostomi, Sarcopterygii, Dipnotetrapodomorpha, Tetrapoda, Amniota, Mammalia, Theria, Eutheria, Boreoeutheria, Euarchontoglires, Primates, Haplorrhini, Simiiformes, Catarrhini, Hominoidea (apes), Hominidae (great apes), Homini…	COP9 signalosome complex subunit 5 (SGN5) (Signalosome subunit 5) (EC 3.4.-.-) (Jun activation domain-binding protein 1)	334	IPR037740;IPR040961;IPR000555;IPR037518;
Q12468	Saccharomyces cerevisiae (strain ATCC 204508 / S288c) (Baker's yeast)	cellular organisms, Eukaryota, Opisthokonta, Fungi, Dikarya, Ascomycota, saccharomyceta, Saccharomycotina (true yeasts), Saccharomycetes, Saccharomycetales, Saccharomycetaceae, Saccharomyces, Saccharomyces cerevisiae (Baker's yeast), Saccharomyces cerevisiae (strain ATCC 204508 / S288c) (Baker's yeast)	COP9 signalosome complex subunit 5 (EC 3.4.-.-)	440	IPR037740;IPR000555;IPR037518;
Q6PC30	Danio rerio (Zebrafish) (Brachydanio rerio)	cellular organisms, Eukaryota, Opisthokonta, Metazoa, Eumetazoa, Bilateria, Deuterostomia, Chordata, Craniata, Vertebrata, Gnathostomata (jawed vertebrates), Teleostomi, Euteleostomi, Actinopterygii, Actinopteri, Neopterygii, Teleostei, Osteoglossocephalai, Clupeocephala, Otomorpha, Ostariophysi, Otophysi, Cypriniphysae, Cypriniformes (carps and others), Cyprinoidei, Cyprinidae, Danio, Danio reri…	COP9 signalosome complex subunit 5 (Signalosome subunit 5) (EC 3.4.-.-)	334	IPR037740;IPR040961;IPR000555;IPR037518;
Q54PF3	Dictyostelium discoideum (Slime mold)	cellular organisms, Eukaryota, Amoebozoa, Evosea, Eumycetozoa, Dictyostelia (dictyostelid cellular slime molds), Dictyosteliales, Dictyosteliaceae, Dictyostelium, Dictyostelium discoideum (Slime mold)	COP9 signalosome complex subunit 5 (Signalosome subunit 5) (EC 3.4.-.-)	332	IPR037740;IPR040961;IPR000555;IPR037518;
Q6GLM9	Xenopus laevis (African clawed frog)	cellular organisms, Eukaryota, Opisthokonta, Metazoa, Eumetazoa, Bilateria, Deuterostomia, Chordata, Craniata, Vertebrata, Gnathostomata (jawed vertebrates), Teleostomi, Euteleostomi, Sarcopterygii, Dipnotetrapodomorpha, Tetrapoda, Amphibia, Batrachia, Anura, Pipoidea, Pipidae, Xenopodinae, Xenopus, Xenopus, Xenopus laevis (African clawed frog)	COP9 signalosome complex subunit 5 (Signalosome subunit 5) (EC 3.4.-.-)	332	IPR037740;IPR040961;IPR000555;IPR037518;
Q59PG6	Candida albicans (strain SC5314 / ATCC MYA-2876) (Yeast)	cellular organisms, Eukaryota, Opisthokonta, Fungi, Dikarya, Ascomycota, saccharomyceta, Saccharomycotina (true yeasts), Saccharomycetes, Saccharomycetales, Debaryomycetaceae, Candida/Lodderomyces clade, Candida, Candida albicans (Yeast), Candida albicans (strain SC5314 / ATCC MYA-2876) (Yeast)	COP9 signalosome complex subunit 5 (EC 3.4.-.-)	609	IPR037740;IPR000555;IPR037518;
Q4P804	Ustilago maydis (strain 521 / FGSC 9021) (Corn smut fungus)	cellular organisms, Eukaryota, Opisthokonta, Fungi, Dikarya, Basidiomycota, Ustilaginomycotina, Ustilaginomycetes, Ustilaginales, Ustilaginaceae, Ustilago, Ustilago maydis (Corn smut fungus), Ustilago maydis (strain 521 / FGSC 9021) (Corn smut fungus)	COP9 signalosome complex subunit 5 (EC 3.4.-.-)	406	IPR037740;IPR040961;IPR000555;IPR037518;
Q6CRJ8	Kluyveromyces lactis (strain ATCC 8585 / CBS 2359 / DSM 70799 / NBRC 1267 / NRRL Y-1140 / WM37) (Yeast) (Candida sphaerica)	cellular organisms, Eukaryota, Opisthokonta, Fungi, Dikarya, Ascomycota, saccharomyceta, Saccharomycotina (true yeasts), Saccharomycetes, Saccharomycetales, Saccharomycetaceae, Kluyveromyces, Kluyveromyces lactis (Yeast) (Candida sphaerica), Kluyveromyces lactis (strain ATCC 8585 / CBS 2359 / DSM 70799 / NBRC 1267 / NRRL Y-1140 / WM37) (Yeast) (Candida sphaerica)	COP9 signalosome complex subunit 5 (EC 3.4.-.-)	373	IPR037740;IPR000555;IPR037518;
Q6C703	Yarrowia lipolytica (strain CLIB 122 / E 150) (Yeast) (Candida lipolytica)	cellular organisms, Eukaryota, Opisthokonta, Fungi, Dikarya, Ascomycota, saccharomyceta, Saccharomycotina (true yeasts), Saccharomycetes, Saccharomycetales, Dipodascaceae, Yarrowia, Yarrowia lipolytica (Candida lipolytica), Yarrowia lipolytica (strain CLIB 122 / E 150) (Yeast) (Candida lipolytica)	COP9 signalosome complex subunit 5 (EC 3.4.-.-)	354	IPR037740;IPR040961;IPR000555;IPR037518;
Q4WZP2	Neosartorya fumigata (strain ATCC MYA-4609 / Af293 / CBS 101355 / FGSC A1100) (Aspergillus fumigatus)	cellular organisms, Eukaryota, Opisthokonta, Fungi, Dikarya, Ascomycota, saccharomyceta, Pezizomycotina, leotiomyceta, Eurotiomycetes, Eurotiomycetidae, Eurotiales (green and blue molds), Aspergillaceae, Aspergillus, Neosartorya fumigata (Aspergillus fumigatus), Neosartorya fumigata (strain ATCC MYA-4609 / Af293 / CBS 101355 / FGSC A1100) (Aspergillus fumigatus)	COP9 signalosome complex subunit 5 (EC 3.4.-.-)	334	IPR037740;IPR040961;IPR000555;IPR037518;
Q6BMQ3	Debaryomyces hansenii (strain ATCC 36239 / CBS 767 / JCM 1990 / NBRC 0083 / IGC 2968) (Yeast) (Torulaspora hansenii)	cellular organisms, Eukaryota, Opisthokonta, Fungi, Dikarya, Ascomycota, saccharomyceta, Saccharomycotina (true yeasts), Saccharomycetes, Saccharomycetales, Debaryomycetaceae, Debaryomyces, Debaryomyces hansenii (Yeast) (Torulaspora hansenii), Debaryomyces hansenii (strain ATCC 36239 / CBS 767 / JCM 1990 / NBRC 0083 / IGC 2968) (Yeast) (Torulaspora hansenii)	COP9 signalosome complex subunit 5 (EC 3.4.-.-)	469	IPR037740;IPR000555;IPR037518;
Q6FT36	Candida glabrata (strain ATCC 2001 / CBS 138 / JCM 3761 / NBRC 0622 / NRRL Y-65) (Yeast) (Torulopsis glabrata)	cellular organisms, Eukaryota, Opisthokonta, Fungi, Dikarya, Ascomycota, saccharomyceta, Saccharomycotina (true yeasts), Saccharomycetes, Saccharomycetales, Saccharomycetaceae, Nakaseomyces, Nakaseomyces/Candida clade, Candida glabrata (Yeast) (Torulopsis glabrata), Candida glabrata (strain ATCC 2001 / CBS 138 / JCM 3761 / NBRC 0622 / NRRL Y-65) (Yeast) (Torulopsis glabrata)	COP9 signalosome complex subunit 5 (EC 3.4.-.-)	465	IPR037740;IPR000555;IPR037518;
Q4IJM4	Gibberella zeae (strain PH-1 / ATCC MYA-4620 / FGSC 9075 / NRRL 31084) (Wheat head blight fungus) (Fusarium graminearum)	cellular organisms, Eukaryota, Opisthokonta, Fungi, Dikarya, Ascomycota, saccharomyceta, Pezizomycotina, leotiomyceta, sordariomyceta, Sordariomycetes, Hypocreomycetidae, Hypocreales, Nectriaceae, Fusarium, Fusarium sambucinum species complex, Gibberella zeae (Wheat head blight fungus) (Fusarium graminearum), Gibberella zeae (strain PH-1 / ATCC MYA-4620 / FGSC 9075 / NRRL 31084) (Wheat head bligh…	COP9 signalosome complex subunit 5 (EC 3.4.-.-)	340	IPR037740;IPR040961;IPR000555;IPR037518;
P0CQ25	Cryptococcus neoformans var. neoformans serotype D (strain B-3501A) (Filobasidiella neoformans)	cellular organisms, Eukaryota, Opisthokonta, Fungi, Dikarya, Basidiomycota, Agaricomycotina, Tremellomycetes, Tremellales (jelly fungi), Cryptococcaceae, Cryptococcus, Cryptococcus neoformans species complex, Cryptococcus neoformans (Filobasidiella neoformans), Cryptococcus neoformans var. neoformans, Cryptococcus neoformans var. neoformans serotype D (strain B-3501A) (Filobasidiella neoformans)	COP9 signalosome complex subunit 5 (EC 3.4.-.-)	371	IPR037740;IPR040961;IPR000555;IPR037518;
A0A0Q4BJ71	Methanomassiliicoccales archaeon RumEn M1	cellular organisms, Archaea, Euryarchaeota, Diaforarchaea group, Thermoplasmata, Methanomassiliicoccales, unclassified Methanomassiliicoccales, Methanomassiliicoccales archaeon RumEn M1	MPN domain-containing protein	181	IPR037740;IPR000555;IPR037518;
A0A443S4I5	Leptotrombidium deliense	cellular organisms, Eukaryota, Opisthokonta, Metazoa, Eumetazoa, Bilateria, Protostomia, Ecdysozoa, Panarthropoda, Arthropoda, Chelicerata, Arachnida, Acari, Acariformes, Trombidiformes, Prostigmata, Anystina, Parasitengona (velvet mites), Trombiculoidea, Trombiculidae (chiggers), Leptotrombidium, Leptotrombidium deliense	26S proteasome non-ATPase regulatory subunit 14-like protein (Fragment)	189	IPR000555;IPR037518;IPR035299;
A0A0A7L9W5	Candidatus Methanoplasma termitum	cellular organisms, Archaea, Euryarchaeota, Diaforarchaea group, Thermoplasmata, Methanomassiliicoccales, Methanomassiliicoccaceae, Candidatus Methanoplasma, Candidatus Methanoplasma termitum	Mov34/MPN/PAD-1 family protein	166	IPR000555;IPR037518;
